# Supplementary material
Source: ML conference proceedings conference paper supplement (https://openaccess.thecvf.com/content/CVPR2026/html/Wang_OntoAug_Rethinking_Generative_CVPR_2026_paper.html)
Supplement: Supplementary file 1 [file Wang_OntoAug_Rethinking_Generative_CVPR_2026_supplemental.pdf]

# OntoAug: Rethinking Generative Data Augmentation via Ontology Guidance

## Supplementary Material

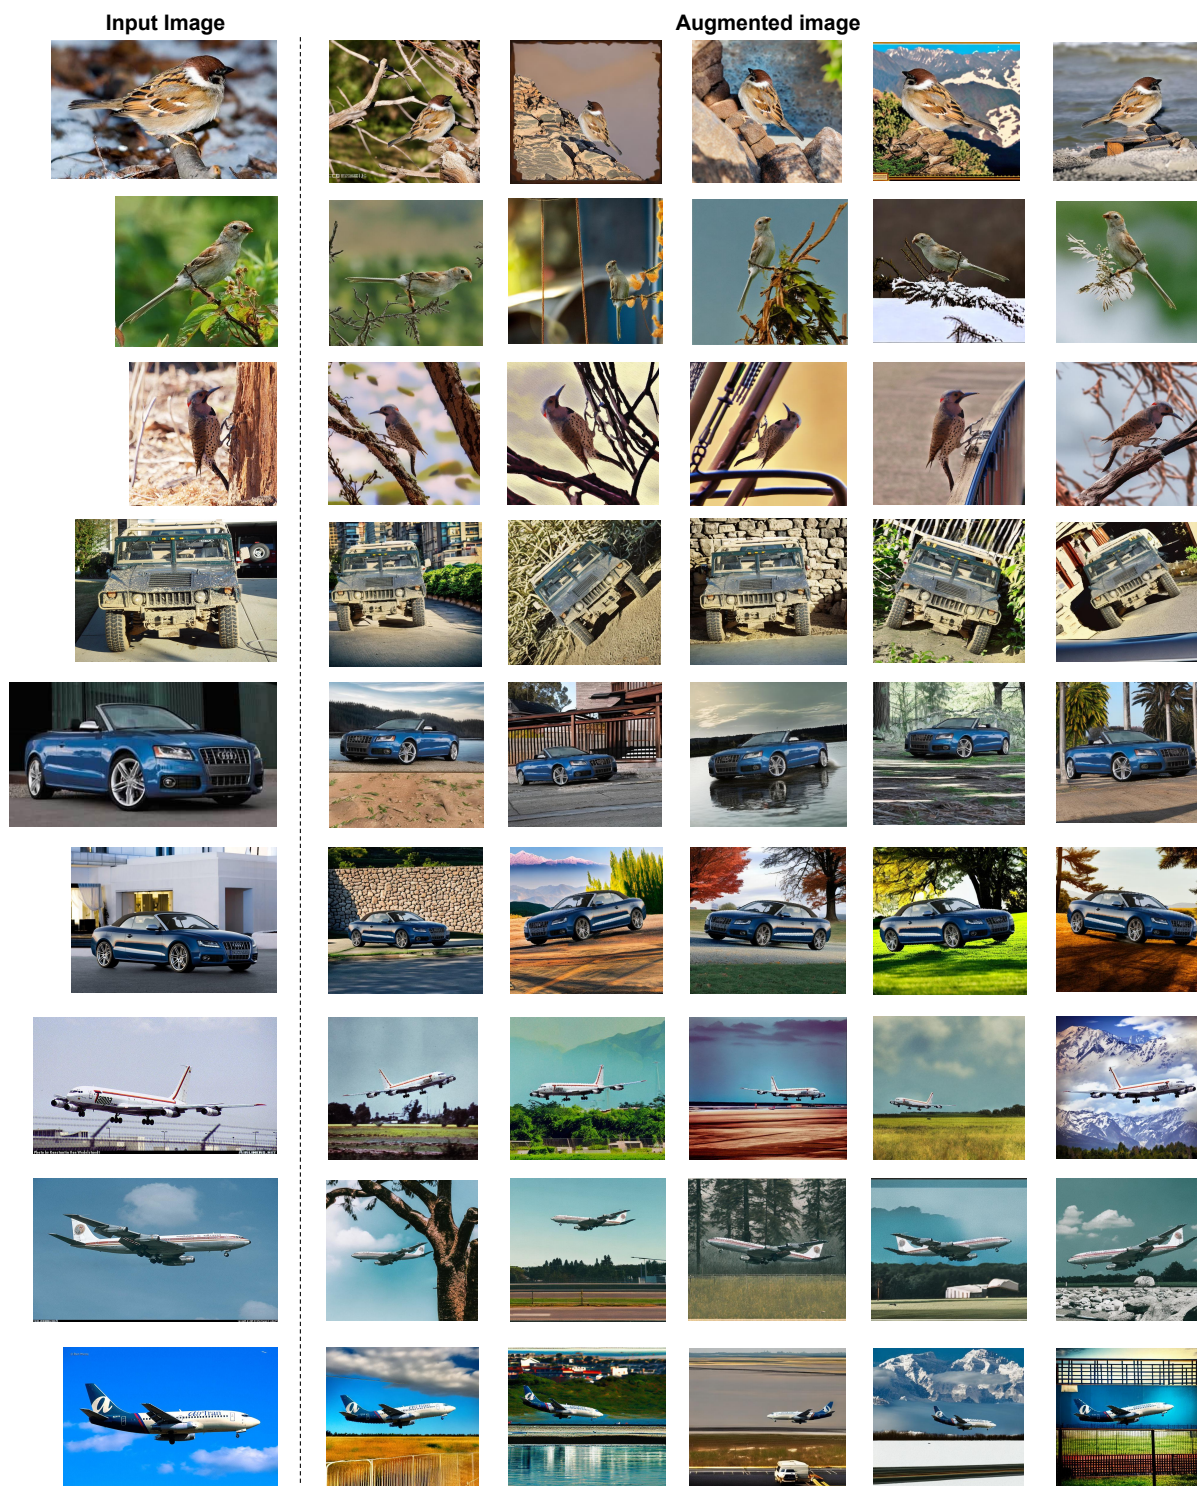

Figure 1. Examples generated by OntoAug.

|                   |                     |                     |                    |                |
|-------------------|---------------------|---------------------|--------------------|----------------|
| grassland         | blue sky            | tree                | water              | rock           |
| green plants      | leaf                | sky                 | trunk              | ripple         |
| vegetation        | green leaf          | clear sky           | tree trunk         | water surface  |
| plants            | green leaves        | sunny sky           | pine tree          | ocean          |
| green vegetation  | coastal waves       | white clouds        | bark               | waterside      |
| bushes            | woodland            | clouds              | loose soil         | lake           |
| thickets          | serene waters       | cloud formations    | distant horizon    | seawater       |
| moss              | jungle              | till lake           | loess ground       | coast          |
| thicket           | rainforest          | crystal-clear water | grassland soil     | coastline      |
| field             | taiga               | twilight sky        | hillside soil      | waves          |
| wetland           | flowing river       | red soil surface    | golden sand        | dock           |
| green lawn        | calm sea            | dry soil            | beach sunrise      | river          |
| grass             | bright sky          | plowed field        | beach sunset       | seaweed        |
| green grassland   | desert soil         | cracked earth       | wet sand           | plankton       |
| weeds             | sunlit sky          | barren land soil    | graffiti           | body of water  |
| dry grass         | stone bricks        | red bricks          | forest floor soil  | swamp          |
| hay               | cloudy sky          | concrete            | white wall         | coastal area   |
| meadow            | background wall     | blue background     | muddy path         | droplet        |
| prairie           | snowy night         | brick wall          | glass curtain wall | moist soil     |
| savanna           | flatland            | calm ocean          | rocky coast        | aquatic area   |
| steppe            | tall grass          | tiles               | tide pools         | avenue         |
| pasture           | gray background     | valley              | autumn forest      | sleet          |
| plains            | mountain lake       | metal wall          | black humus soil   | snowcap        |
| branch            | concrete wall       | snowfall            | tundra             | lane           |
| rolling hills     | cascading waterfall | cozy                | white sand         | pavement       |
| sunny field       | landscape           | waterfall           | white background   | concrete floor |
| golden horizon    | black background    | snowy sunrise       | azure sea          | avenue         |
| mountain chain    | mountain road       | highland            | mountainside       | hillside       |
| forest            | road                | beach               | soil ground        | snowman        |
| woodland          | stone               | ground              | shore              | soil           |
| grove             | pebble              | rocky ground        | sandy ground       | ground         |
| temperate forest  | falls               | billboard           | weathered wall     | frozen lake    |
| tropical forest   | concrete ground     | desert              | plastic panel      | blossom        |
| dense woods       | small stone         | gravel ground       | sand               | wooden door    |
| mountainous woods | wall                | muddy ground        | display board      | farmland soil  |
| autumn            | wire                | snowfield           | wooden stake       | wire mesh      |
| mountain range    | blue sea            | winter              | wood               | city           |
| fall              | glass               | snow                | tree stump         | window         |
| lakeshore         | bricks              | snowscape           | pillar             | village        |
| rippling water    | still lake          | overcast sky        | utility pole       | stone wall     |

Table 1. The complete list of background words.

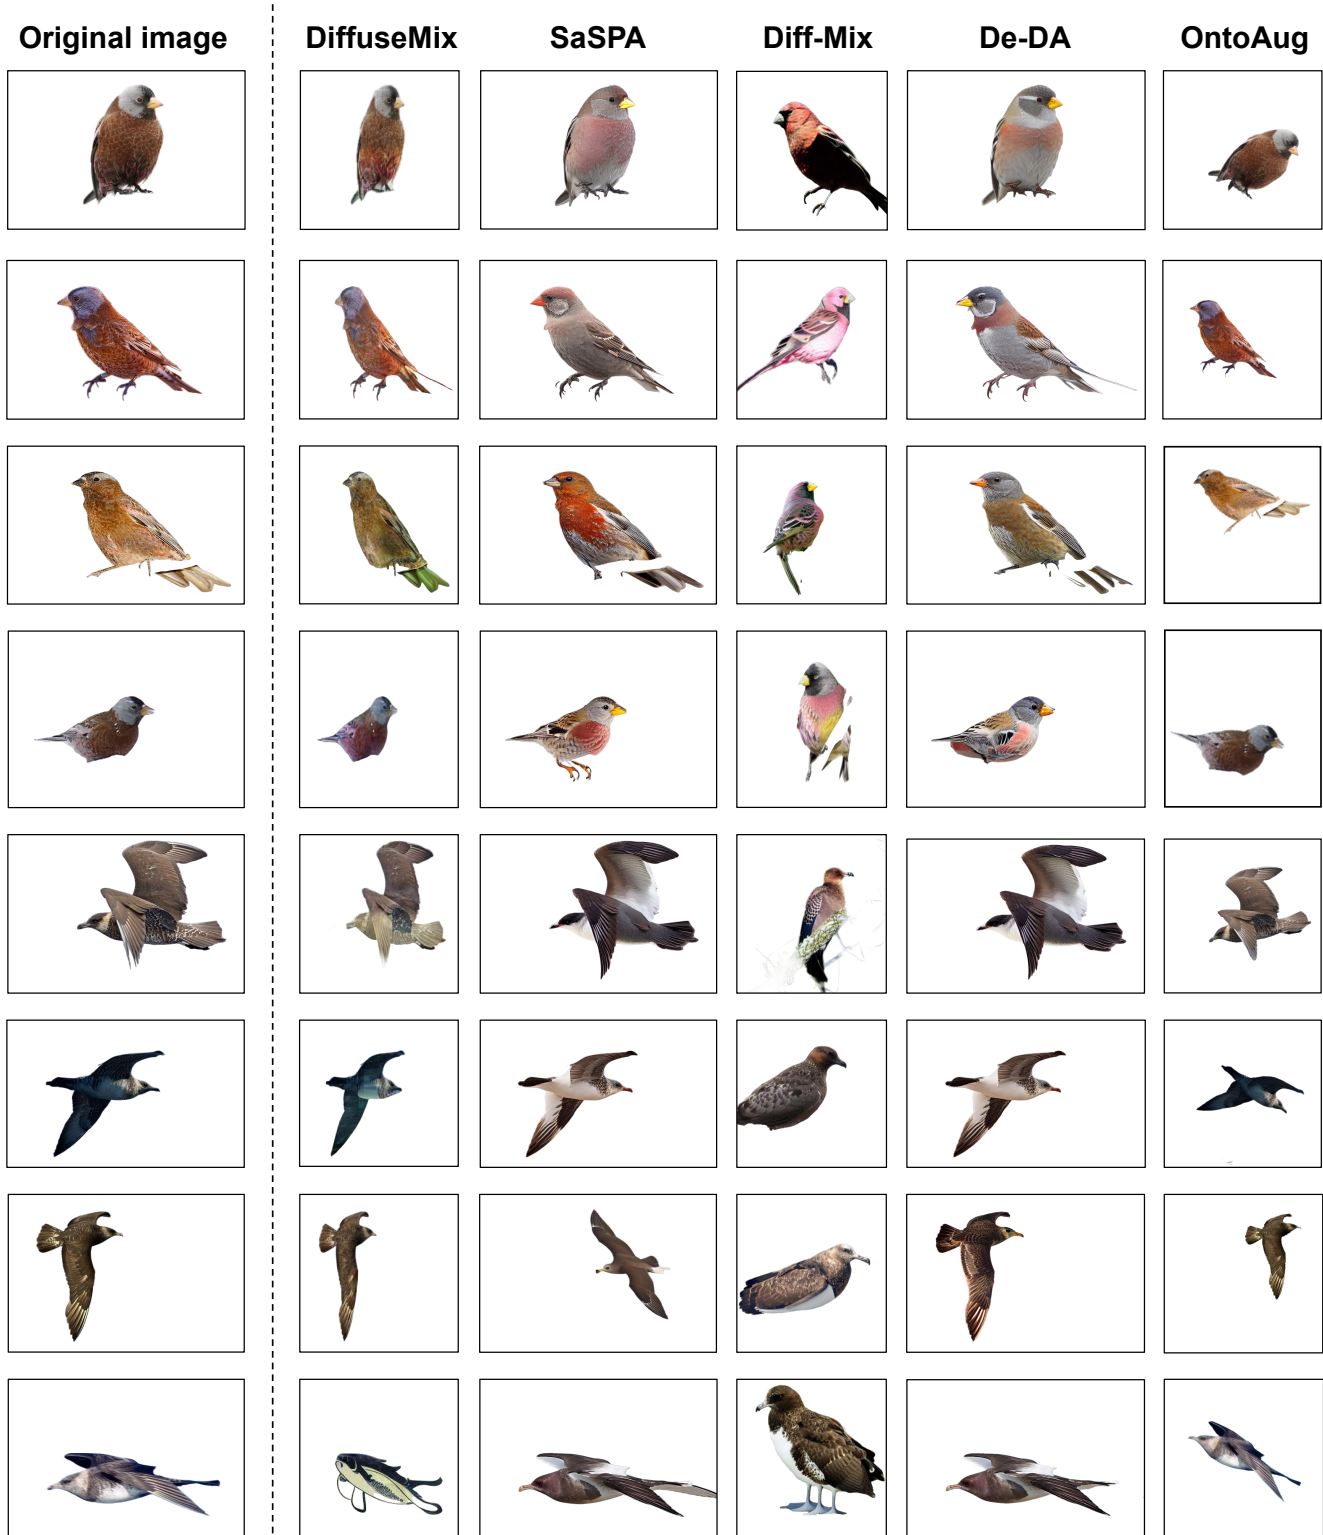

Figure 2. The comparison of various generative methods in terms of the details of the ontological part reveals that other methods generally lead to significant changes in core visual features such as texture and color of the ontology. In contrast, our proposed method achieves diversification of the ontological part's layout while strictly preserving its essential characteristics.
